# Supplementary material for: Real-world experience with obeticholic acid in patients with primary biliary cholangitis
Source: PubMed Central journal article supplement — JHEP Rep. 2021 Jan 27;3(2):100248. doi: 10.1016/j.jhepr.2021.100248 (PMC7930359; doi:10.1016/j.jhepr.2021.100248), 2021-01-27
Supplement: mmc1.pdf [file mmc1.pdf]

# **Real-world experience with obeticholic acid in patients with primary biliary cholangitis**

Daphne D'Amato, Antonio De Vincentis, Federica Malinverno, Mauro Viganò, Domenico Alvaro, Maurizio Pompili, Antonino Picciotto, Valeria Pace Palitti, Maurizio Russello, Silvia Storato, Marie Graciella Pigozzi, Vincenza Calvaruso, Elisabetta De Gasperi, Ana Lleo, Antonino Castellaneta, Adriano Pellicelli, Nora Cazzagon, Annarosa Floreani, Luigi Muratori, Stefano Faggioli, Grazia Anna Niro, Valentina Feletti, Raffaele Cozzolongo, Natalia Terreni, Marco Marzioni, Rinaldo Pellicano, Pietro Pozzoni, Leonardo Baiocchi, Luchino Chessa, Floriano Rosina, Gaetano Bertino, Maria Vinci, Anna Morgando, Ester Vanni, Gaetano Scifo, Rodolfo Sacco, Maria D'Antò, Valentina Bellia, Roberto Boldizzoni, Silvia Casella, Barbara Omazzi, Guido Poggi, Laura Cristoferi, Alessio Gerussi, Vincenzo Ronca, Rosanna Venere, Francesca Ponziani, Maria Cannavò, Alessandro Mussetto, Rosanna Fontana, Francesco Losito, Evelise Frazzetto, Marco Distefano, Francesca Colapietro, Sara Labanca, Giulia Marconi, Giuseppe Grassi, Giovanni Galati, Sarah Elizabeth O'Donnell, Clara Mancuso, Giacomo Mulinacci, Andrea Palermo, Ernesto Claar, Antonio Izzi, Antonio Picardi, Pietro Invernizzi, Marco Carbone, Umberto Vespasiani-Gentilucci, on behalf of the Italian PBC Registry and the Club Epatologi Ospedalieri (CLEO)/Associazione Italiana Gastroenterologi ed Endoscopisti Digestivi Ospedalieri (AIGO) PBC Study Group.

Table of contents

|                             |   |
|-----------------------------|---|
| Supplementary methods ..... | 2 |
| Supplementary results ..... | 3 |

## Supplementary methods

### Indications to OCA treatment

Indications to OCA treatment, which in Italy essentially coincides with the criteria by which second-line therapy with OCA is reimbursed by the National Health Service, are an ALP $\geq$ 1.5 per upper limit of normal (ULN) and/or 1mg/dL $\leq$ bilirubin $\leq$ 2mg/dL after at least 12 months of treatment with UDCA, or the intolerance to UDCA. According to the package insert in Italy, in patients with compensated cirrhosis, OCA therapy should be initiated at 5 mg/day dose and re-evaluated after six months for possible up-titration at 10 mg/day in case of suboptimal response, where suboptimal response is not further defined but generally assumed to be an ALP level still  $\geq$ 1.5/UNL. Conversely, in patients with decompensated liver disease (Child-Pugh B and C cirrhosis), OCA is recommended to be started at 5 mg/week dose, and, if tolerated and judged necessary according to suboptimal response after three months, gradually up-titrated until a maximum dose of 10 mg twice weekly.

## Supplementary results

**Table S1.** Characteristics of study population according to the presence of cirrhosis

| Characteristic                              | Liver Cirrhosis                     |                   | p-value  |  |
|---------------------------------------------|-------------------------------------|-------------------|----------|--|
|                                             | No, N = 130                         | Yes, N = 61       |          |  |
| Sex, female                                 | 120 (92%)                           | 60 (98%)          | 0.2      |  |
| Age at diagnosis, years                     | 48 (40, 55)                         | 50 (42, 56)       | 0.2      |  |
| Age at OCA start                            | 56 (47, 62)                         | 61 (53, 66)       | 0.003    |  |
| AIH Overlap                                 | 17 (13%)                            | 11 (18%)          | 0.5      |  |
| Centre level                                |                                     |                   | 0.6      |  |
|                                             | <i>Secondary</i>                    | 66 (51%)          | 28 (46%) |  |
|                                             | <i>Tertiary</i>                     | 64 (49%)          | 33 (54%) |  |
| UDCA dose, mg/kg                            | 15.0 (15.0, 17.0)                   | 15.5 (15.0, 18.0) | 0.4      |  |
| Duration of disease before OCA start, years | 6.0 (3.0, 11.0)                     | 8.0 (5.0, 13.0)   | 0.086    |  |
| OCA dose                                    |                                     |                   | <0.001   |  |
|                                             | < 5 mg daily                        | 3 (2.3%)          | 7 (11%)  |  |
|                                             | 5 mg daily                          | 69 (53%)          | 46 (75%) |  |
|                                             | 5 mg up-titrated to 10 mg daily     | 58 (45%)          | 8 (13%)  |  |
| ALP/ULN at baseline                         | 2.06 (1.61, 2.72)                   | 2.18 (1.73, 3.06) | 0.2      |  |
| ALT/ULN at baseline                         | 1.21 (0.74, 1.75)                   | 1.10 (0.82, 1.89) | 0.7      |  |
| AST/ULN at baseline                         | 1.00 (0.74, 1.40)                   | 1.23 (1.00, 2.17) | <0.001   |  |
| GGT/ULN at baseline                         | 4.0 (2.4, 6.9)                      | 4.6 (2.8, 7.4)    | 0.4      |  |
| Total Bilirubin/ULN at baseline             | 0.70 (0.50, 1.00)                   | 1.00 (0.70, 1.30) | <0.001   |  |
| ALP/ULN at 12 months                        | 1.38 (1.09, 1.80)                   | 1.34 (1.12, 1.80) | 0.6      |  |
| AST/ULN at 12 months                        | 0.83 (0.65, 1.00)                   | 0.97 (0.73, 1.19) | 0.018    |  |
| ALT/ULN at 12 months                        | 0.85 (0.54, 1.08)                   | 0.78 (0.50, 1.04) | 0.7      |  |
| GGT/ULN at 12 months                        | 1.45 (0.90, 2.85)                   | 1.91 (1.04, 3.01) | 0.7      |  |
| Total Bilirubin at 12 months                | 0.56 (0.40, 0.88)                   | 0.91 (0.57, 1.07) | <0.001   |  |
| Bilirubin Delta at 12 months                | -14 (-30, 9)                        | -4 (-21, 12)      | 0.2      |  |
| OCA started after Fibrates                  | 4 (3.1%)                            | 2 (3.3%)          | >0.9     |  |
| OCA discontinuation before 12 m             | 15 (12%)                            | 18 (30%)          | 0.004    |  |
| Reason for OCA discontinuation              |                                     |                   | 0.11     |  |
|                                             | <i>Abdominal pain</i>               | 1 (4.8%)          | 1 (5.0%) |  |
|                                             | <i>Anaemia</i>                      | 0 (0%)            | 2 (10%)  |  |
|                                             | <i>Death for TIPS complications</i> | 0 (0%)            | 1 (5.0%) |  |
|                                             | <i>Demyelinating disease</i>        | 1 (4.8%)          | 0 (0%)   |  |
|                                             | <i>Dizzying syndrome</i>            | 1 (4.8%)          | 0 (0%)   |  |
|                                             | <i>Eczema</i>                       | 0 (0%)            | 1 (5.0%) |  |
|                                             | <i>Headache</i>                     | 0 (0%)            | 1 (5.0%) |  |
|                                             | <i>Myalgia</i>                      | 1 (4.8%)          | 0 (0%)   |  |
|                                             | <i>OCA intolerance</i>              | 1 (4.8%)          | 0 (0%)   |  |
|                                             | <i>Pruritus</i>                     | 15 (71%)          | 11 (55%) |  |
|                                             | <i>Worsening liver enzymes</i>      | 1 (4.8%)          | 0 (0%)   |  |
|                                             | <i>Worsening liver function</i>     | 0 (0%)            | 3 (15%)  |  |

Data expressed as median (interquartile range) or number (percentage).  
Comparisons carried out with  $\chi^2$  test or Mann-Whitney U test as appropriate.

**Table S2.** Characteristics of study population according to presence of PBC-AIH overlap

| Characteristic                              | PBC-AIH overlap                        |                   | p-value  |  |
|---------------------------------------------|----------------------------------------|-------------------|----------|--|
|                                             | No, N = 163                            | Yes, N = 28       |          |  |
| Sex, female                                 | 152 (93%)                              | 28 (100%)         | 0.4      |  |
| Age at diagnosis, years                     | 49 (42, 56)                            | 44 (38, 51)       | 0.015    |  |
| Age at OCA start                            | 58 (49, 65)                            | 54 (45, 58)       | 0.011    |  |
| Cirrhosis                                   | 50 (31%)                               | 11 (39%)          | 0.5      |  |
| Centre level                                |                                        |                   | 0.080    |  |
|                                             | <i>Secondary</i>                       | 85 (52%)          | 9 (32%)  |  |
|                                             | <i>Tertiary</i>                        | 78 (48%)          | 19 (68%) |  |
| UDCA dose, mg/kg                            | 15.0 (15.0, 17.0)                      | 16.3 (15.0, 20.2) | 0.019    |  |
| Duration of disease before OCA start, years | 7.0 (3.0, 11.0)                        | 6.0 (3.8, 11.2)   | 0.6      |  |
| OCA dose                                    |                                        |                   | 0.2      |  |
|                                             | <i>&lt; 5 mg daily</i>                 | 9 (5.5%)          | 1 (3.6%) |  |
|                                             | <i>5 mg daily</i>                      | 102 (63%)         | 13 (46%) |  |
|                                             | <i>5 mg up-titrated to 10 mg daily</i> | 52 (32%)          | 14 (50%) |  |
| ALP/ULN at baseline                         | 2.07 (1.68, 2.70)                      | 2.13 (1.73, 3.47) | 0.4      |  |
| ALT/ULN at baseline                         | 1.06 (0.75, 1.74)                      | 1.66 (1.22, 2.37) | 0.003    |  |
| AST/ULN at baseline                         | 1.05 (0.79, 1.46)                      | 1.29 (0.99, 2.13) | 0.048    |  |
| GGT/ULN at baseline                         | 4.0 (2.3, 6.3)                         | 6.2 (3.1, 12.3)   | 0.033    |  |
| Total Bilirubin/ULN at baseline             | 0.80 (0.59, 1.00)                      | 0.79 (0.53, 1.11) | 0.8      |  |
| ALP/ULN at 12 months                        | 1.36 (1.08, 1.80)                      | 1.35 (1.10, 1.76) | >0.9     |  |
| AST/ULN at 12 months                        | 0.80 (0.65, 1.00)                      | 1.00 (0.91, 1.32) | 0.003    |  |
| ALT/ULN at 12 months                        | 0.76 (0.50, 1.03)                      | 0.94 (0.78, 1.20) | 0.028    |  |
| GGT/ULN at 12 months                        | 1.42 (0.92, 2.62)                      | 2.54 (1.00, 3.60) | 0.047    |  |
| Total Bilirubin at 12 months                | 0.60 (0.44, 0.90)                      | 0.80 (0.40, 1.00) | 0.4      |  |
| Bilirubin Delta at 12 months                | -11 (-28, 9)                           | -10 (-27, 15)     | 0.9      |  |
| OCA started after Fibrates                  | 4 (2.5%)                               | 2 (7.1%)          | 0.2      |  |
| OCA discontinuation before 12 m             | 30 (18%)                               | 3 (11%)           | 0.4      |  |
| Reason for OCA discontinuation              |                                        |                   | 0.4      |  |
|                                             | <i>Abdominal pain</i>                  | 2 (5.7%)          | 0 (0%)   |  |
|                                             | <i>Anaemia</i>                         | 2 (5.7%)          | 0 (0%)   |  |
|                                             | <i>Death for TIPS complications</i>    | 1 (2.9%)          | 0 (0%)   |  |
|                                             | <i>Demyelinating disease</i>           | 0 (0%)            | 1 (17%)  |  |
|                                             | <i>Dizzying syndrome</i>               | 1 (2.9%)          | 0 (0%)   |  |
|                                             | <i>Eczema</i>                          | 0 (0%)            | 1 (17%)  |  |
|                                             | <i>Headache</i>                        | 1 (2.9%)          | 0 (0%)   |  |
|                                             | <i>Myalgia</i>                         | 1 (2.9%)          | 0 (0%)   |  |
|                                             | <i>OCA intolerance</i>                 | 1 (2.9%)          | 0 (0%)   |  |
|                                             | <i>Pruritus</i>                        | 22 (63%)          | 4 (67%)  |  |
|                                             | <i>Worsening liver enzymes</i>         | 1 (2.9%)          | 0 (0%)   |  |
|                                             | <i>Worsening liver function</i>        | 3 (8.6%)          | 0 (0%)   |  |

Data expressed as median (interquartile range) or number (percentage).  
Comparisons carried out with  $\chi^2$  test or Mann-Whitney U test as appropriate.

**Table S3.** Characteristics of study population according to Secondary and Tertiary centers.

| Characteristic                              | Centre level                        |                   | p-value  |  |
|---------------------------------------------|-------------------------------------|-------------------|----------|--|
|                                             | Secondary, N = 94                   | Tertiary, N = 97  |          |  |
| Sex, female                                 | 90 (96%)                            | 90 (93%)          | 0.6      |  |
| Age at diagnosis, years                     | 51 (42, 57)                         | 47 (40, 54)       | 0.027    |  |
| Age at OCA start                            | 59 (53, 64)                         | 54 (47, 63)       | 0.018    |  |
| AIH Overlap                                 | 9 (9.6%)                            | 19 (20%)          | 0.080    |  |
| Cirrhosis                                   | 28 (30%)                            | 33 (34%)          | 0.6      |  |
| UDCA dose, mg/kg                            | 15.0 (15.0, 16.9)                   | 15.1 (15.0, 18.0) | 0.2      |  |
| Duration of disease before OCA start, years | 7.0 (4.0, 11.8)                     | 6.0 (3.0, 11.0)   | 0.4      |  |
| OCA dose                                    |                                     |                   | 0.079    |  |
|                                             | < 5 mg daily                        | 8 (8.5%)          | 2 (2.1%) |  |
|                                             | 5 mg daily                          | 58 (62%)          | 57 (59%) |  |
|                                             | 5 mg up-titrated to 10 mg daily     | 28 (30%)          | 38 (39%) |  |
| ALP/ULN at baseline                         | 2.05 (1.66, 2.66)                   | 2.13 (1.74, 3.16) | 0.10     |  |
| ALT/ULN at baseline                         | 1.06 (0.80, 1.70)                   | 1.27 (0.77, 1.91) | 0.2      |  |
| AST/ULN at baseline                         | 1.06 (0.77, 1.47)                   | 1.06 (0.86, 1.70) | 0.5      |  |
| GGT/ULN at baseline                         | 3.5 (1.9, 6.0)                      | 4.7 (2.8, 8.9)    | 0.004    |  |
| Total Bilirubin/ULN at baseline             | 0.90 (0.60, 1.10)                   | 0.73 (0.51, 1.00) | 0.3      |  |
| ALP/ULN at 12 months                        | 1.26 (1.02, 1.53)                   | 1.50 (1.13, 2.03) | 0.004    |  |
| AST/ULN at 12 months                        | 0.77 (0.65, 1.00)                   | 0.91 (0.70, 1.10) | 0.057    |  |
| ALT/ULN at 12 months                        | 0.70 (0.49, 0.92)                   | 1.00 (0.57, 1.15) | 0.002    |  |
| GGT/ULN at 12 months                        | 1.12 (0.75, 2.19)                   | 2.17 (1.20, 3.58) | <0.001   |  |
| Total Bilirubin at 12 months                | 0.65 (0.45, 1.00)                   | 0.59 (0.42, 0.92) | 0.6      |  |
| Bilirubin Delta at 12 months                | -10 (-24, 10)                       | -14 (-29, 9)      | 0.5      |  |
| OCA started after Fibrates                  | 0 (0%)                              | 6 (6.2%)          | 0.029    |  |
| OCA discontinuation before 12 m             | 19 (20%)                            | 14 (14%)          | 0.4      |  |
| Reason for OCA discontinuation              |                                     |                   | 0.8      |  |
|                                             | <i>Abdominal pain</i>               | 1 (4.8%)          | 1 (5.0%) |  |
|                                             | <i>Anaemia</i>                      | 0 (0%)            | 2 (10%)  |  |
|                                             | <i>Death for TIPS complications</i> | 1 (4.8%)          | 0 (0%)   |  |
|                                             | <i>Demyelinating disease</i>        | 1 (4.8%)          | 0 (0%)   |  |
|                                             | <i>Dizzying syndrome</i>            | 1 (4.8%)          | 0 (0%)   |  |
|                                             | <i>Eczema</i>                       | 0 (0%)            | 1 (5.0%) |  |
|                                             | <i>Headache</i>                     | 1 (4.8%)          | 0 (0%)   |  |
|                                             | <i>Myalgia</i>                      | 0 (0%)            | 1 (5.0%) |  |
|                                             | <i>OCA intolerance</i>              | 0 (0%)            | 1 (5.0%) |  |
|                                             | <i>Pruritus</i>                     | 13 (62%)          | 13 (65%) |  |
|                                             | <i>Worsening liver enzymes</i>      | 1 (4.8%)          | 0 (0%)   |  |
|                                             | <i>Worsening liver function</i>     | 2 (9.5%)          | 1 (5.0%) |  |

Data expressed as median (interquartile range) or number (percentage).

Comparisons carried out with  $\chi^2$  test or Mann-Whitney U test as appropriate.

**Table S4.** Factors associated with lack of response to obeticholic acid at 6 months.

| Variable                                 | Univariate<br>RR (95%CI), p | aRR (95%CI), p          | Multivariate<br>aRR* (95%CI), p |
|------------------------------------------|-----------------------------|-------------------------|---------------------------------|
| Age, years                               | 1.00 (1.00-1.01), 0.332     |                         |                                 |
| Age at PBC diagnosis, years              | 1.01 (0.99-1.02), 0.333     |                         |                                 |
| Age at OCA start, years                  | 1.00 (1.00-1.01), 0.335     | 1.01 (1.00-1.03), 0.068 | 1.01 (1.00-1.02), 0.131         |
| Male sex                                 | 1.26 (0.93-1.70), 0.131     | 0.75 (0.40-1.41), 0.374 | 0.71 (0.37-1.35), 0.296         |
| ANA positivity                           | 0.86 (0.68-1.09), 0.226     |                         |                                 |
| AMA positivity                           | 0.91 (0.70-1.18), 0.479     |                         |                                 |
| Liver cirrhosis                          | 1.18 (0.97-1.45), 0.099     | 1.23 (0.95-1.58), 0.114 | 1.18 (0.92-1.53), 0.199         |
| PBC-AIH overlap                          | 0.97 (0.72-1.31), 0.842     |                         |                                 |
| Triple therapy with UDCA, OCA & Fibrates | 1.09 (0.67-1.76), 0.736     |                         |                                 |
| OCA started after Fibrates               | 1.27 (0.88-1.85), 0.203     |                         |                                 |
| Duration of PBC, years                   | 1.00 (0.98-1.01), 0.692     |                         |                                 |
| ALP/ULN at baseline                      | 1.07 (1.00-1.14), 0.043     | 1.14 (1.04-1.25), 0.004 | 1.13 (1.03-1.24), 0.009         |
| ALT/ULN at baseline                      | 1.10 (1.02-1.18), 0.011     | 1.00 (0.82-1.23), 0.963 | 1.02 (0.83-1.25), 0.853         |
| AST/ULN at baseline                      | 1.12 (1.03-1.21), 0.006     | 0.95 (0.78-1.17), 0.640 | 0.92 (0.75-1.12), 0.402         |
| GGT/ULN at baseline                      | 1.01 (1.00-1.03), 0.034     | 1.00 (0.98-1.02), 0.759 | 1.01 (0.99-1.03), 0.435         |
| Total bilirubin/ULN at baseline          | 1.15 (1.04-1.28), 0.007     | 1.17 (1-1.37), 0.046    | 1.14 (0.97-1.33), 0.113         |

Response to OCA evaluated according to Poise criteria in the intention-to-treat population.

Abbreviations: aRR, adjusted risk ratio; AIH, autoimmune hepatitis; ALP, alkaline phosphatase; ALT, alanine-transferase; AST, aspartate-transferase; AMA, anti-mitochondrial antibodies; ANA, antinuclear antibodies; CI, confidence intervals; GGT, gamma-glutamyl transferase; OCA, obeticholic acid; PBC, primary biliary cholangitis; RR, risk ratio; UDCA, ursodeoxycholic acid; ULN, upper limit of normal.

\* additionally corrected for OCA discontinuation.

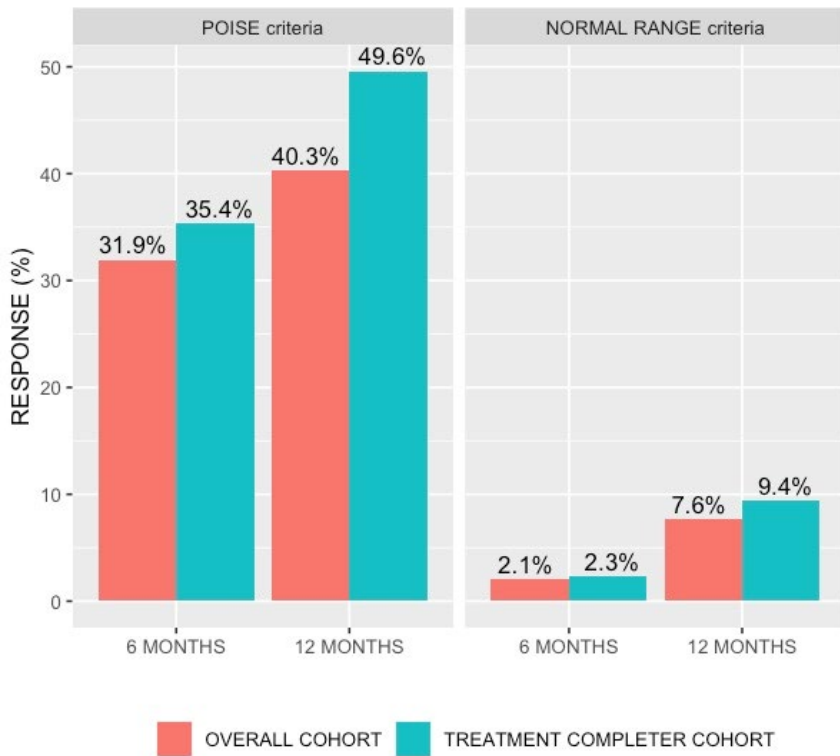

**Fig. S1.** Rates of response to OCA therapy according to the POISE (left panel) and the normal range criteria (right panel) in the 144 patients with ALP/ULN  $\geq 1.67$ , of the Overall cohort and treatment completers cohort.

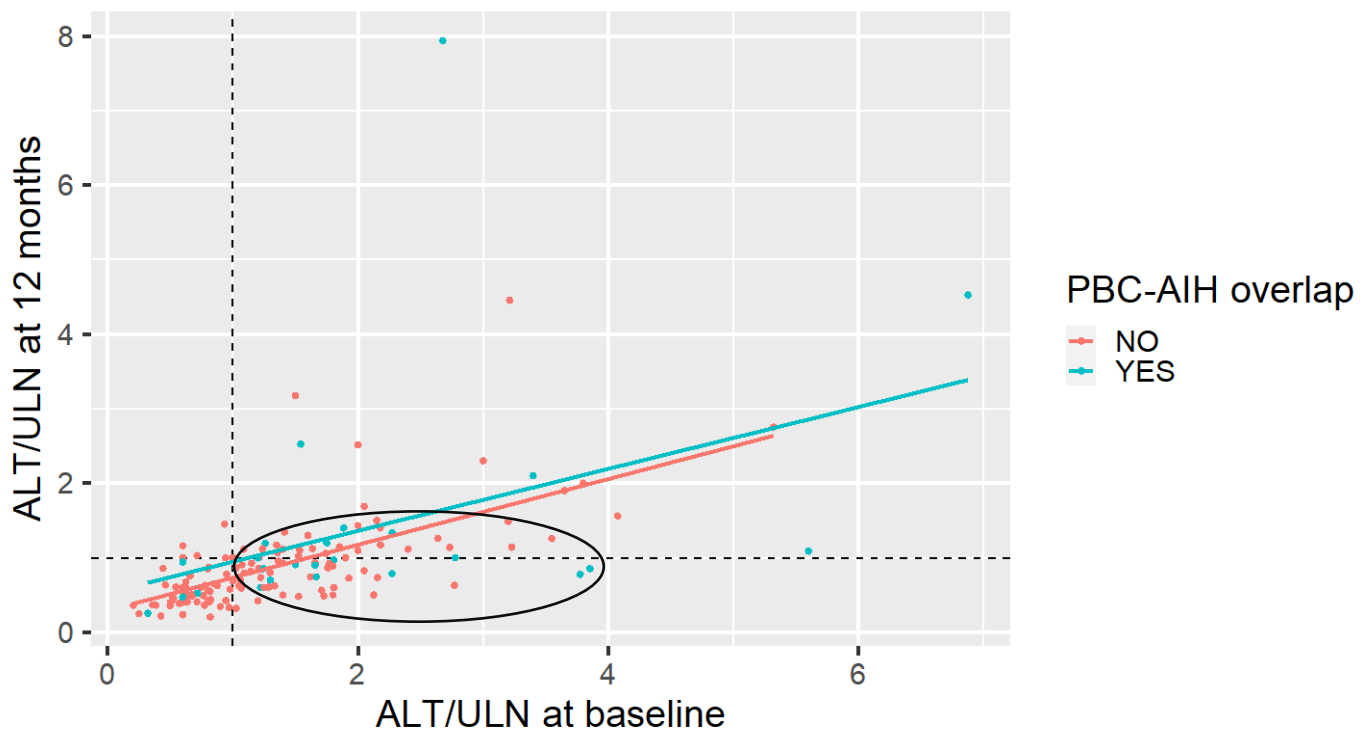

**Fig. S2.** Improvement of ALT/ULN levels after 12 months of treatment with OCA in patients with pure PBC and AIH-PBC overlap.

### Safety and side effects

Assessment of safety and side effects included adverse events, laboratory variables, and systematic assessment of pruritus.

Within the study period four patients experienced serious adverse events. The first patient was a Child-Pugh A5 cirrhotic man, started on OCA at the dose of 5 mg/daily. After one month of therapy, he experienced worsening bilirubin and severe pruritus which prompted OCA withdrawal. The liver synthetic function improved, however within a year, he complicated with lung infection and liver failure and deceased. The second patient was a Child-Pugh B7 cirrhotic woman, who started OCA at the dose of 5 mg/week, and presented worsening of bilirubin after nine months, which led to OCA withdrawal. Thereafter, the patient had a partial improvement of liver function, however died for Coronavirus Disease 19 chest infection 8 months after OCA discontinuation. The third patient was a Child-Pugh B9 cirrhotic woman, who initiated OCA at the dose of 5 mg/week, discontinued after four months for worsening bilirubin. After a partial recovery of liver function, she progressively deteriorated and received a liver transplant seven months after OCA withdrawal. Finally, a Child-Pugh A5 cirrhotic woman died within the study period for liver failure after a TIPS placement.

### Missed up titrations

We defined missed up-titrations when patients were taking 5 mg/day at 12 months even though they had an ALP  $\geq 1.5$  UNL at six months and they did not reported pruritus at last follow-up visit.

Considering all the study cohort, among forty-seven patients with ALP value  $\geq 1.5$  and absence of pruritus at six months (i.e. eligible for up-titration), 29 (62%) did not up-titrate; 13 (45%) and 2 (7%) of these, achieved response according to Poise criteria and normal range criteria, respectively; out of the 18 patients who did up-titrate, response rate were 5 (28%) and zero, respectively.

Considering cirrhotic patients, out of 14 cirrhotic patients with ALP value  $\geq 1.5$  and absence of pruritus at six months (i.e. eligible for up-titration), 12 (86%) did not up-titrate. Among these, 4 and 0 achieved response according to Poise criteria and normal range criteria, respectively; no patient who did up-titrate responded according to both criteria.

Considering PBC-AIH overlap patients, out of 5 patients with ALP value  $\geq 1.5$  and absence of pruritus at six months (i.e. eligible for up-titration), 3 did not up titrated, of whom 1 and 0 had a biochemical response according to Poise criteria and normal range criteria, respectively.
