# Supplementary material for: Real-world experience with obeticholic acid in patients with primary biliary cholangitis
Source: PubMed Central journal article supplement — JHEP Rep. 2021 Jan 27;3(2):100248. doi: 10.1016/j.jhepr.2021.100248 (PMC7930359; doi:10.1016/j.jhepr.2021.100248), 2021-01-27
Supplement: mmc2.pdf [file mmc2.pdf]

## JHEP Reports

### CTAT methods

Tables for a “Complete, Transparent, Accurate and Timely account” (CTAT) are now mandatory for all revised submissions. The aim is to enhance the reproducibility of methods.

- Only include the parts relevant to your study
- Refer to the CTAT in the main text as ‘Supplementary CTAT Table’
- Do not add subheadings
- Add as many rows as needed to include all information
- Only include one item per row

If the CTAT form is not relevant to your study, please outline the reasons why:

|  |
|--|
|  |
|--|

#### 1.1 Antibodies

| Name | Citation | Supplier | Cat no. | Clone no. |
|------|----------|----------|---------|-----------|
|      |          |          |         |           |

#### 1.2 Cell lines

| Name | Citation | Supplier | Cat no. | Passage no. | Authentication test method |
|------|----------|----------|---------|-------------|----------------------------|
|      |          |          |         |             |                            |

#### 1.3 Organisms

| Name | Citation | Supplier | Strain | Sex | Age | Overall n number |
|------|----------|----------|--------|-----|-----|------------------|
|      |          |          |        |     |     |                  |

#### 1.4 Sequence based reagents

| Name | Sequence | Supplier |
|------|----------|----------|
|      |          |          |

#### 1.5 Biological samples

| Description | Source | Identifier |
|-------------|--------|------------|
|             |        |            |

#### 1.6 Deposited data

| Name of repository    | Identifier             | Link |
|-----------------------|------------------------|------|
| Registro Italiano CBP | Prof Pietro Invernizzi |      |

## 1.7 Software

| Software name | Manufacturer                                                                                                                     | Version |
|---------------|----------------------------------------------------------------------------------------------------------------------------------|---------|
| R version     | (R Foundation for Statistical Computing, Vienna, Austria; <a href="https://www.R-project.org/">https://www.R-project.org/</a> ). | 3.6.1   |

## 1.8 Other (e.g. drugs, proteins, vectors etc.)

|  |  |  |
|--|--|--|
|  |  |  |
|  |  |  |

## 1.9 Please provide the details of the corresponding methods author for the manuscript:

|                                                                                                                                                                                                                                 |
|---------------------------------------------------------------------------------------------------------------------------------------------------------------------------------------------------------------------------------|
| Marco Carbone, MD, PhD<br>Department of Medicine and Surgery<br>Centre for Autoimmune Liver Disease<br>University of Milan-Bicocca<br>Milan<br>Tel. +39 039.2334515<br>Mobile: +39 3927333154<br>Email: marco.carbone@unimib.it |
|---------------------------------------------------------------------------------------------------------------------------------------------------------------------------------------------------------------------------------|

## 2.0 Please confirm for randomised controlled trials all versions of the clinical protocol are included in the submission. These will be published online as supplementary information.

|  |
|--|
|  |
|--|
